# Supplementary material for: A novel strategy to prepare a Pt–SnO2 nanocomposite as a highly efficient counter electrode for dye-sensitized solar cells
Source: Royal Society of Chemistry journal article supplement (doi:10.1039/c4ta03774j), 2014-01-01
Supplement: c4ta03774j1.pdf [file c4ta03774j1.pdf]

## Supporting Information

---

### **A Novel Strategy to Prepare Pt-SnO<sub>2</sub> Nanocomposite as Highly Efficient Counter Electrode for Dye- Sensitized Solar Cells†**

*Xiao Chen,<sup>a†</sup> Yu Hou,<sup>a†</sup> Shuang Yang,<sup>a</sup> Xiao Hua Yang<sup>\*a</sup> and Hua Gui Yang<sup>\*a,b</sup>*

<sup>a</sup> Key Laboratory for Ultrafine Materials of Ministry of Education, School of Materials Science and Engineering, East China University of Science and Technology, 130 Meilong Road, Shanghai 200237, China.

<sup>b</sup> Centre for Clean Environment and Energy, Gold Coast Campus, Griffith University, Gold Coast, Queensland 4222, Australia.

Correspondence and requests for materials should be addressed to H.G.Y. (email: hgyang@ecust.edu.cn) or X.H.Y. (email: yangxiaohuayou@163.com).

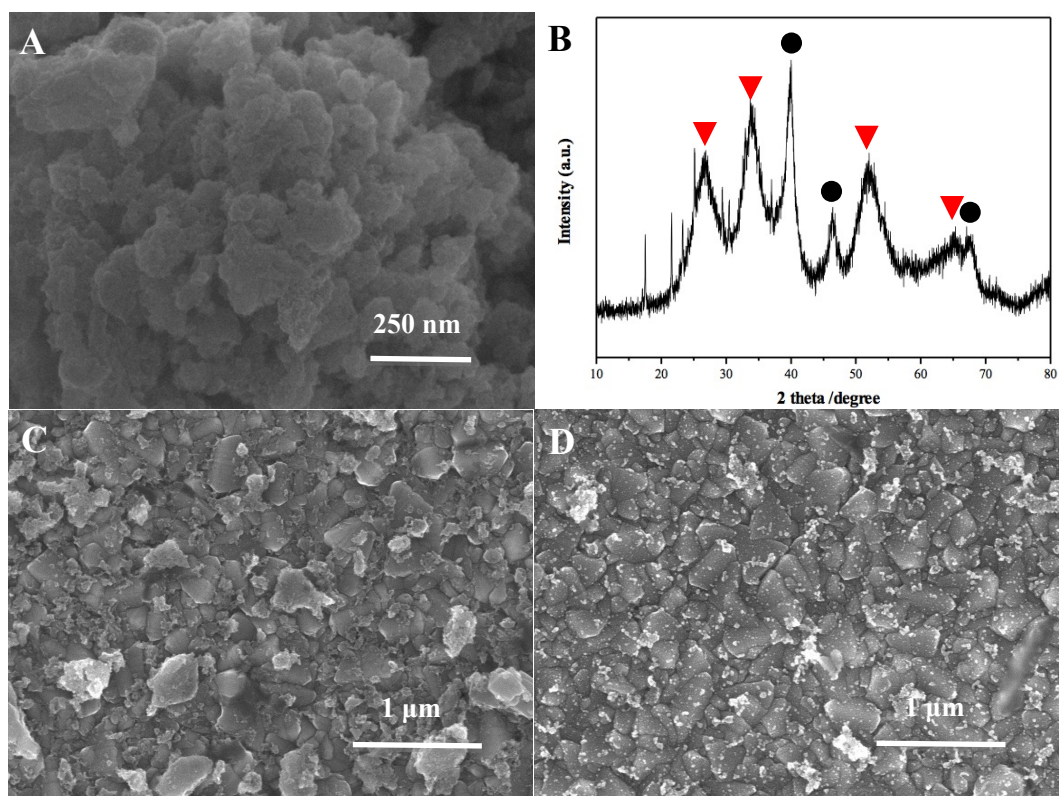

**Fig. S1** (A) SEM images of Pt-SnO<sub>2</sub> nanocomposites after annealing at 723 K. (B) XRD patterns of Pt-SnO<sub>2</sub> nanocomposites after thermal treatment at 723 K (red triangle: peaks of SnO<sub>2</sub>, black circle: peaks of Pt). (C) SEM images of Pt-SnO<sub>2</sub> CE on FTO. (D) SEM images of Pt CE on FTO.

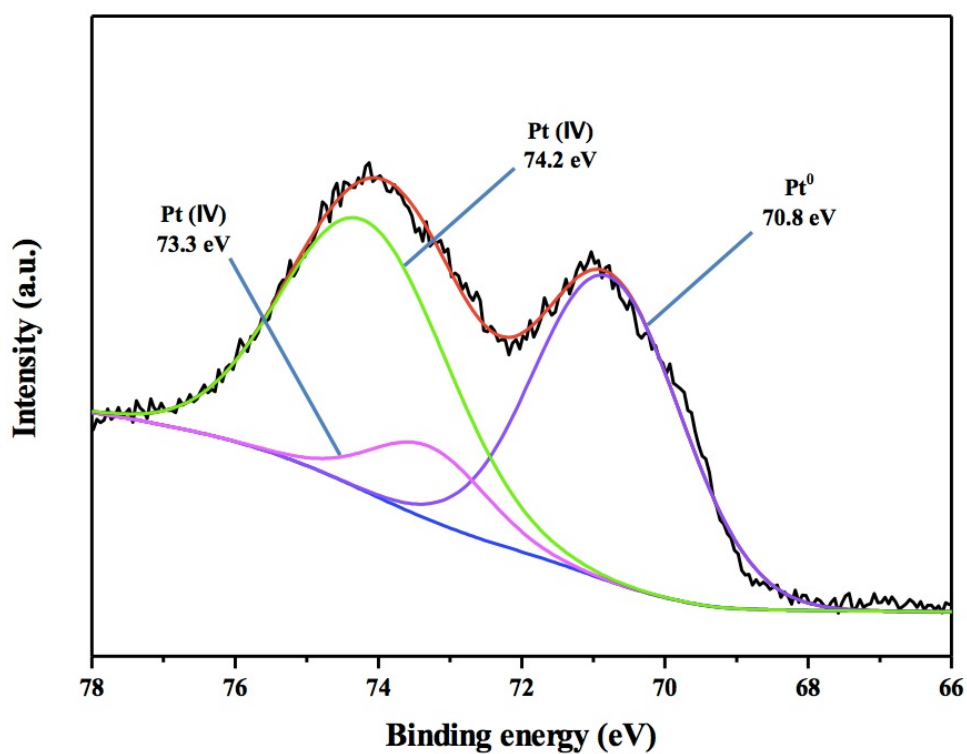

**Fig. S2** The Pt4f peaks in the XPS spectra of Pt-SnO<sub>2</sub> nanocomposites after annealing at 723 K.

**Table S1** Specific surface area, masses of CE materials and total area of different CEs.

| CE                  | <i>Specific surface area/<br/><math>m^2 g^{-1}</math></i> | <i>Mass/<br/><math>\mu g</math></i> | <i>Total area/<br/><math>cm^2</math></i> |
|---------------------|-----------------------------------------------------------|-------------------------------------|------------------------------------------|
| Pt                  | 10.48                                                     | 6.0                                 | 0.63                                     |
| Pt/SnO <sub>2</sub> | 36.96                                                     | 4.4                                 | 1.63                                     |
